# Supplementary material
Source: PubMed Central journal article supplement (PMC3207480)
Supplement: supp_M111.288993_jbc.M111.288993-1.pdf [file supp_M111.288993_jbc.M111.288993-1.pdf]

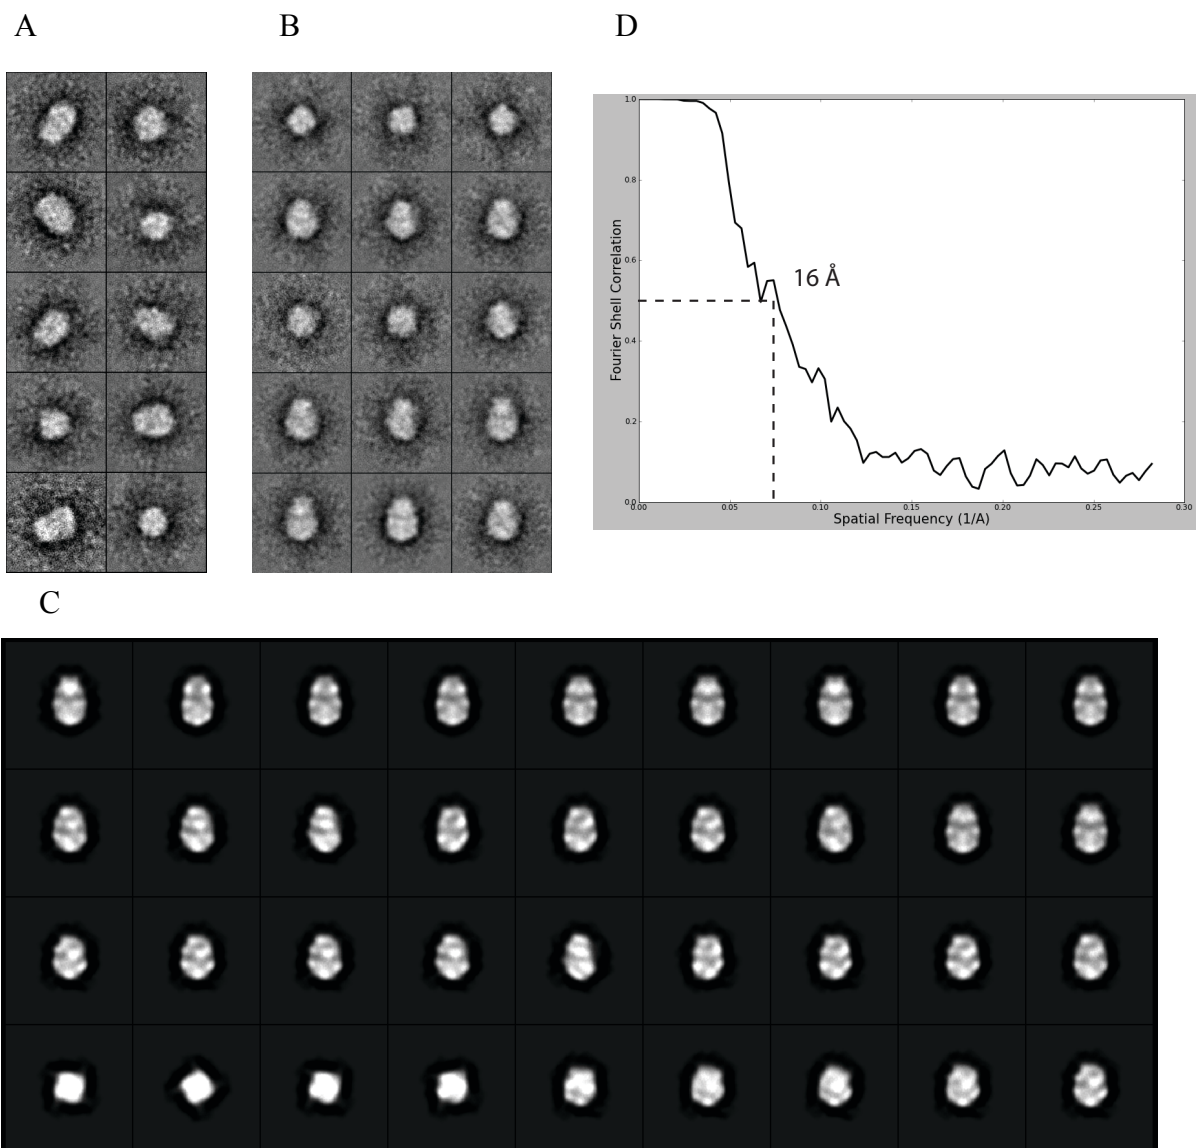

**FIGURE S1.** Single particle electron microscopy of TRPA1 in A8-35 amphiphol. *A*, Representative reference-free class average with no imposed symmetry. *B*, Four-fold symmetry imposed class averages. *C*, Back projections from the three-dimensional structure. *D*, Fourier shell correlation indicating a resolution of 16 Å (0.5 cutoff).
